# Supplementary material
Source: PubMed Central journal article supplement (PMC8263692)
Supplement: ajcr0011-3252-f3.pdf [file ajcr0011-3252-f3.pdf]

## Supplementary Methods

### Methods

#### *SNP genotyping*

In the discovery MDACC CM GWAS dataset, genomic DNA was extracted from CM patients for genotyping using the Illumina HumanOmni-Quad\_v1\_0\_B array. The genotyping data are available from the National Center for Biotechnology Information Database of Genotypes and Phenotypes (dbGaP Study Accession: phs000187.v1.p1). Genome-wide imputation was performed based on the 1000 Genomes Project, phase I v2 CEU, utilizing the MACH software (March 2010 release). Following strict criteria (imputation info score  $\geq 0.8$ , a genotyping rate  $\geq 95\%$ , a minor allelic frequency  $\geq 5\%$ , and Hardy-Weinberg equilibrium  $\geq 1 \times 10^{-5}$ ), we extracted SNPs within  $\pm 2$  kilobase flanking regions of myeloid cell-related pathway genes from the MDACC CM GWAS dataset. For the NHS/HPFS replication datasets, genotyping of DNA samples was performed with the HumanHap610 array, the Affymetrix 6.0 array, and the Illumina HumanHap550 array. Further imputation was performed depending on haplotype information and genotyped SNPs from 1000 Genomes Project phase II CEU data by applying the MACH program (March 2012 release). The genotyping data were extracted from the NHS/HPFS CM GWAS datasets, following the same quality-control criteria for those from the MDACC CM GWAS dataset.

#### *Statistical methods*

For the present study, CMSS was defined as the period from the date of diagnosis of CM to the date of death from CM or the end of follow-up, whichever came first. CM patients known to be alive were censored at the time of the last contact. In the discovery MDACC dataset, we first assessed the associations between all available SNPs in 280 myeloid cell-related pathway genes and CMSS in a single-locus analysis using the GenABEL package of R software. Then multivariable Cox proportional hazards regression analyses were performed with adjustment for available covariates in the MDACC dataset (including age, sex, Breslow thickness, ulceration, distant/regional metastasis, and mitotic rate); however, in the replication NHS/HPFS dataset, the only variables covariates for adjustment were age and sex. In view of the high level of linkage disequilibrium among acquired SNPs, we employed Bayesian false discovery probability (BFDP) with a cutoff value of 0.80 for multiple testing correction to lower the probability of potentially false positive results. In addition, we assigned a prior probability of 0.10 and an upper boundary hazards ratio (HR) of 3.0 for an association with variant genotypes or minor alleles of the SNPs with  $P < 0.05$ . Next, we applied a multivariable stepwise Cox regression model to identify independent tag SNPs in the MDACC dataset that had more covariate information. We then adopted a meta-analysis to combine the results of the identified SNPs from the MDACC dataset and the NHS/HPFS dataset using PLINK 1.90 with the Cochran's Q statistics and  $I^2$  for heterogeneity test. Because there was no significant heterogeneity between the MDACC dataset and the NHS/HPFS dataset (Q test  $P > 0.1$ ,  $I^2 < 25.0\%$ ), we performed the meta-analysis with a fixed-effects model. We subsequently evaluated the cumulative effects of all identified SNPs by adding up the risk alleles. For the stratified analyses by subgroups, we calculated inter-study heterogeneity and evaluated the interaction. To evaluate the correlation between the identified SNPs and their genes' mRNA expression, we employed expression quantitative trait loci analyses with a linear regression model using data from the 373 European descendants included in the 1,000 Genomes Project, the genotype-tissue expression project, and The Cancer Genome Atlas database using R software (version 3.5.0). Finally, we explored the association between the mRNA expression levels of the genes where the SNPs are located and CM survival using the KM analysis from an online database. All statistical analyses were performed with SAS software (version 9.4; SAS Institute, Cary, NC) unless specified otherwise.

## SNPs in myeloid cell-related genes and CM survival

**Supplementary Table 1.** List of 280 selected genes in the myeloid cell-related pathway

| Dataset  | Name of pathway                                                                                                                                                                                                                                                                                                                                                                                                                                                                                                                                                                                                                                                                                                                                                                                                                                                                                                                                                                                                                                                                                                                                                                                                                                                                                                                                                                                                                                                                                                                                                                                                                                                                                                                                                                                                                                                                                                                                                                                                                                                                                                                                                             | Number of genes |
|----------|-----------------------------------------------------------------------------------------------------------------------------------------------------------------------------------------------------------------------------------------------------------------------------------------------------------------------------------------------------------------------------------------------------------------------------------------------------------------------------------------------------------------------------------------------------------------------------------------------------------------------------------------------------------------------------------------------------------------------------------------------------------------------------------------------------------------------------------------------------------------------------------------------------------------------------------------------------------------------------------------------------------------------------------------------------------------------------------------------------------------------------------------------------------------------------------------------------------------------------------------------------------------------------------------------------------------------------------------------------------------------------------------------------------------------------------------------------------------------------------------------------------------------------------------------------------------------------------------------------------------------------------------------------------------------------------------------------------------------------------------------------------------------------------------------------------------------------------------------------------------------------------------------------------------------------------------------------------------------------------------------------------------------------------------------------------------------------------------------------------------------------------------------------------------------------|-----------------|
| GO       | GO_NEGATIVE_REGULATION_OF_MYELOID_CELL_DIFFERENTIATION                                                                                                                                                                                                                                                                                                                                                                                                                                                                                                                                                                                                                                                                                                                                                                                                                                                                                                                                                                                                                                                                                                                                                                                                                                                                                                                                                                                                                                                                                                                                                                                                                                                                                                                                                                                                                                                                                                                                                                                                                                                                                                                      | 92              |
| GO       | GO_HEMATOPOIETIC_STEM_CELL_PROLIFERATION                                                                                                                                                                                                                                                                                                                                                                                                                                                                                                                                                                                                                                                                                                                                                                                                                                                                                                                                                                                                                                                                                                                                                                                                                                                                                                                                                                                                                                                                                                                                                                                                                                                                                                                                                                                                                                                                                                                                                                                                                                                                                                                                    | 23              |
| GO       | GO_HEMATOPOIETIC_PROGENITOR_CELL_DIFFERENTIATION                                                                                                                                                                                                                                                                                                                                                                                                                                                                                                                                                                                                                                                                                                                                                                                                                                                                                                                                                                                                                                                                                                                                                                                                                                                                                                                                                                                                                                                                                                                                                                                                                                                                                                                                                                                                                                                                                                                                                                                                                                                                                                                            | 162             |
| GO       | GO GRANULOCYTE DIFFERENTIATION                                                                                                                                                                                                                                                                                                                                                                                                                                                                                                                                                                                                                                                                                                                                                                                                                                                                                                                                                                                                                                                                                                                                                                                                                                                                                                                                                                                                                                                                                                                                                                                                                                                                                                                                                                                                                                                                                                                                                                                                                                                                                                                                              | 33              |
| REACTOME | REACTOME_RUNX1_REGULATES_TRANSCRIPTION_OF_GENES_INVOLVED_IN_DIFFERENTIATION_OF_MYELOID_CELLS_7                                                                                                                                                                                                                                                                                                                                                                                                                                                                                                                                                                                                                                                                                                                                                                                                                                                                                                                                                                                                                                                                                                                                                                                                                                                                                                                                                                                                                                                                                                                                                                                                                                                                                                                                                                                                                                                                                                                                                                                                                                                                              | 7               |
| KEGG     | -                                                                                                                                                                                                                                                                                                                                                                                                                                                                                                                                                                                                                                                                                                                                                                                                                                                                                                                                                                                                                                                                                                                                                                                                                                                                                                                                                                                                                                                                                                                                                                                                                                                                                                                                                                                                                                                                                                                                                                                                                                                                                                                                                                           | 0               |
| BIOCARTA | -                                                                                                                                                                                                                                                                                                                                                                                                                                                                                                                                                                                                                                                                                                                                                                                                                                                                                                                                                                                                                                                                                                                                                                                                                                                                                                                                                                                                                                                                                                                                                                                                                                                                                                                                                                                                                                                                                                                                                                                                                                                                                                                                                                           | 0               |
| PID      | -                                                                                                                                                                                                                                                                                                                                                                                                                                                                                                                                                                                                                                                                                                                                                                                                                                                                                                                                                                                                                                                                                                                                                                                                                                                                                                                                                                                                                                                                                                                                                                                                                                                                                                                                                                                                                                                                                                                                                                                                                                                                                                                                                                           | 0               |
| Total    | <i>C1QC, HAX1, LBR, TAL1, ACP6, HES5, KCNAB2, MIXL1, PRRC2C, PSMA5, PSMB2, PSMB4, PSMD4, PTPRC, SSBP3, TP73, WDR78, YTHDF2, CD34, WNT2B, APCS, CDC73, HIST2H4A, HIST2H4B, ITPKB, PIAS3, RBM15, INPP5D, SP3, EIF2AK2, NFE2L2, PLEK, PSMD1, PSMD14, PSME4, SOS1, XRCC5, GPR55, INHA, MEIS1, TMEM178A, ADIPOQ, GATA2, HCLS1, JAGN1, DHX36, HES1, HYAL2, MLF1, PSMD2, PSMD6, TREX1, ARIH2, MECOM, THPO, WNT5A, CLDN18, CTNNB1, GPR171, LTF, TCTA, LEF1, HERC6, KIT, PDGFRA, RBM47, REST, SFRP2, FBXW7, PF4, TLR3, CSF2<br/>IL5, CSF1R, FNIP1, FST, PDGFRB, TENT2, CARTPT, HSPA9<br/>IL4, PIK3R1, L3MBTL3, BVES, DACT2, FOXC1, MYB, PDCD2, PSMB1, PSMB8, PSMB9, SOX4, SRF, ZBTB24, DLL1, HIST1H4A, HIST1H4B, HIST1H4C, HIST1H4D, HIST1H4E, HIST1H4F, HIST1H4H, HIST1H4I, HIST1H4J, HIST1H4K, HIST1H4L, RUNX2, ANLN, BRAF, CDK6, INHBA, PSMA2, PSMC2, PTPRZ1, PUS7, SHH, HOXA5, HOXA7, HOXA9, LRRC17, NCAPG2, TRIB1, AGPAT5, CEBPD, ESCO2, PRKDC, RRS1, SFRP1, ZFAT, LYN, MYC<br/>PTK2B, ABL1, NOTCH1, PSMB7, TLR4, DHTKD1, GATA3, LDB1, MMP21, SPI1, DPF2, JAM3, KMT2A, LMO1, LMO2, PSMA1, PSMC3, PSMD13, YAP1, CTR9, MIR125B1, UBASH3B, ZBTB16, TESC, C12orf29, KRT75, PSMD9, PTPN6, ETV6, KITLG, SART3<br/>WNT1, WNT10B, HIST4H4, CUL4A, ARHGEF7, ARL11, FLT3, LIG4, N4BP2L2, CEBPE, IL25, BATF, BMP4, EML1, METTL3, PLD4, PSEN1, PSMA3, PSMA6, PSMB11, PSMB5, PSMC1, PSMC6, PSME1, PSME2, SLC8A3, STON2, ZBTB1, GPR68, NFKBIA, ZFP36L1, LGALS3, PSMA4, PYGO1, SIN3A, TCF12, CIB1, FBN1, KLF13, LEO1, MEIS2, WDR61, CBFA2T3, ZFPM1, CBFB, CIAO3, NUDT21, PSMB10, PSMD7, SETD1A, SLC7A6OS, SMPD3, ATXN1L, CREBBP, PRKCB, CSF3, DHRS7B, EVI2B, FASN, RARA, ACE, FLCN, HEATR9, HOXB3, HOXB4, MEOX1, PSMB3, PSMB6, PSMC5, PSMD11, PSMD12, PSMD3, PSME3, TNFRSF13B, TOP2A, CTC1, CCL3, HOXB8, NF1, NME1, NME2, STAT5B, BCL2, PSMA8, SERPINB12, WDR7, PTPN2, CEACAM1, CEBPA, ARMC6, EEF2, ERCC2, FSTL3, PSMC4, PSMD8, SIPA1L3, TCF3, TGFB1, TMEM190, TMEM91, ZNF784, BABAM1, LILRB1, LILRB3, LILRB4, PAF1, PRMT1, ZFP36, ZNF675, ZBTB46, ITCH, PSMA7, PSMF1, MAFB, RUNX1, GABPA, MIR125B2, TOB2 (after removing the duplicated 31 genes, 5 genes in X chromosome, 1 pseudogenes)</i> | 280             |

Keyword: myeloid cell; Organism: Homo sapiens; Website: <http://software.broadinstitute.org/gsea/msigdb/search.jsp>.

## SNPs in myeloid cell-related genes and CM survival

**Supplementary Table 2.** Distributions of the characteristics of CM patients in the MDACC and Harvard genotyping datasets

| Parameter                       | Frequency |           | MFT       | HR (95% CI) <sup>a</sup> | P <sup>a</sup>    |        |
|---------------------------------|-----------|-----------|-----------|--------------------------|-------------------|--------|
|                                 | Patient   | Death (%) |           |                          |                   |        |
| MDACC                           | 858       | 95 (11.1) | 81.1      |                          |                   |        |
| Age (years)                     | ≤50       | 371       | 31 (8.4)  | 85.8                     | 1.00              |        |
|                                 | >50       | 487       | 64 (13.1) | 78.1                     | 1.69 (1.10-2.59)  | 0.017  |
| Sex                             | Female    | 362       | 26 (7.2)  | 85.9                     | 1.00              |        |
|                                 | Male      | 496       | 69 (13.9) | 77.8                     | 2.07 (1.32-3.25)  | 0.002  |
| Regional/distant metastasis     | No        | 709       | 51 (7.2)  | 82.7                     | 1.00              |        |
|                                 | Yes       | 149       | 44 (29.5) | 69.4                     | 4.78 (3.19-7.15)  | <0.001 |
| Breslow thickness (mm)          | ≤1        | 347       | 7 (2.0)   | 85.0                     | 1.00              |        |
|                                 | >1        | 511       | 88 (17.2) | 78.1                     | 9.17 (4.25-19.80) | <0.001 |
| Ulceration                      | No        | 681       | 48 (7.1)  | 84.0                     | 1.00              |        |
|                                 | Yes       | 155       | 43 (27.7) | 64.3                     | 4.91 (3.29-7.42)  | <0.001 |
|                                 | Missing   | 22        |           |                          |                   |        |
| Mitotic rate (mm <sup>2</sup> ) | ≤1        | 275       | 9 (3.3)   | 82.2                     | 1.00              |        |
|                                 | >1        | 583       | 86 (14.8) | 80.1                     | 4.67 (2.35-9.29)  | <0.001 |
| Harvard                         |           | 409       | 48 (11.5) | 179.0                    |                   |        |
| Age (years)                     | ≤50       | 72        | 3 (4.2)   | 352.5                    | 1.00              |        |
|                                 | >50       | 337       | 45 (13.4) | 167.0                    | 4.04 (1.25-13.06) | 0.020  |
| Sex                             | Female    | 271       | 31 (11.4) | 198.0                    | 1.00              |        |
|                                 | Male      | 138       | 17 (12.3) | 155.5                    | 1.16 (0.64-2.10)  | 0.622  |

Abbreviations: CM, cutaneous melanoma; MDACC, The University of Texas MD Anderson Cancer Center; MFT, median follow-up time (months); HR, hazards ratio; CI, confidence interval. <sup>a</sup>Univariate Cox proportional hazards regression analysis.

## SNPs in myeloid cell-related genes and CM survival

**Supplementary Table 3.** Functional prediction of 22 validated SNPs in high linkage disequilibrium (LD) ( $r^2 \geq 0.8$ ) in myeloid cell-related pathway genes

| SNP        | Chr | Position (hg38) | Gene            | Haploreg v4.12 <sup>1</sup> |                        |                        |            |                   |                |                      | GRASP QTL hits | Selected eQTL hits |
|------------|-----|-----------------|-----------------|-----------------------------|------------------------|------------------------|------------|-------------------|----------------|----------------------|----------------|--------------------|
|            |     |                 |                 | LD ( $r^2$ )                | Promoter histone marks | Enhancer histone marks | DNase      | Proteins bound    | Motifs changed |                      |                |                    |
| rs1175649  | 1   | 112476655       | <i>WNT2B</i>    | 1                           |                        | ESC                    |            |                   |                | 4 altered motifs     |                | 6 hits             |
| rs1175650  | 1   | 112476952       | <i>WNT2B</i>    | 1                           |                        |                        |            |                   |                | GR, ZID              |                | 8 hits             |
| rs2798245  | 1   | 112464917       | <i>WNT2B</i>    | 1                           |                        | 15 tissues             | 6 tissues  |                   |                | 5 altered motifs     |                | 7 hits             |
| rs11751812 | 6   | 26187334        | <i>HIST1H4D</i> | 1                           | ESC, iPSC              | 5 tissues              |            |                   |                | Smad3                | 12 hits        | 18 hits            |
| rs11754140 | 6   | 26186976        | <i>HIST1H4D</i> | 1                           |                        | 4 tissues              |            |                   |                | 10 altered motifs    |                | 10 hits            |
| rs6906367  | 6   | 26187125        | <i>HIST1H4D</i> | 1                           | ESC                    | 4 tissues              | ESDR       |                   |                | 5 altered motifs     | 13 hits        | 14 hits            |
| rs11757394 | 6   | 26206694        | <i>HIST1H4E</i> | 1                           | 22 tissues             | 5 tissues              | 26 tissues | 5 bound proteins  |                | DMRT4, Irf, LBP-9    |                | 8 hits             |
| rs2069018  | 6   | 26205718        | <i>HIST1H4E</i> | 0.97                        | 23 tissues             |                        | 49 tissues | 22 bound proteins |                | 4 altered motifs     | 7 hits         | 14 hits            |
| rs2069019  | 6   | 26205604        | <i>HIST1H4E</i> | 1                           | 23 tissues             |                        | 53 tissues | 25 bound proteins |                | Nanog                |                | 8 hits             |
| rs2069020  | 6   | 26205500        | <i>HIST1H4E</i> | 1                           | 23 tissues             |                        | 49 tissues | 18 bound proteins |                | 5 altered motifs     |                | 8 hits             |
| rs56186759 | 6   | 26207181        | <i>HIST1H4E</i> | 1                           | 14 tissues             | 12 tissues             | MUS, OVRY  | POL2, POL24H8     |                | COMP1                |                | 8 hits             |
| rs56220351 | 6   | 26206884        | <i>HIST1H4E</i> | 1                           | 16 tissues             | 12 tissues             |            |                   |                | 4 altered motifs     |                | 8 hits             |
| rs16891407 | 6   | 26206299        | <i>HIST1H4E</i> | 1                           | 23 tissues             |                        | 53 tissues | 15 bound proteins |                | STAT                 | 7 hits         | 18 hits            |
| rs77205516 | 6   | 26205128        | <i>HIST1H4E</i> | 1                           | 23 tissues             |                        | 27 tissues | 4 bound proteins  |                | Zfp105               |                | 8 hits             |
| rs16891481 | 6   | 26242777        | <i>HIST1H4F</i> | 1                           | GI                     | 5 tissues              |            |                   |                | Barhl1, Hoxa5        | 12 hits        | 17 hits            |
| rs3734533  | 6   | 26240624        | <i>HIST1H4F</i> | 0.96                        | 21 tissues             | BRST                   | 46 tissues | 16 bound proteins |                | 4 altered motifs     | 22 hits        | 15 hits            |
| rs41521949 | 11  | 122597367       | <i>UBASH3B</i>  | 1                           | BLD                    | 11 tissues             | 6 tissues  |                   |                | 4 altered motifs     |                | 1 hits             |
| rs73018235 | 11  | 122599673       | <i>UBASH3B</i>  | 1                           | BLD                    | 9 tissues              | KID, THYM  |                   |                | GR, LXR, STAT        |                | 1 hits             |
| rs73018236 | 11  | 122600620       | <i>UBASH3B</i>  | 1                           |                        | BLD, HYM, SPLN         |            |                   |                | Pax-5, Zbtb3, Znf143 |                | 1 hits             |
| rs7952454  | 11  | 122597548       | <i>UBASH3B</i>  | 1                           | 4 tissues              | 16 tissues             | 5 tissues  |                   |                | 7 altered motifs     |                | 1 hits             |
| rs61959910 | 13  | 50207885        | <i>ARL11</i>    | 1                           |                        | BLD, HRT, VAS          |            | GATA2             |                | 4 altered motifs     |                |                    |
| rs10151787 | 14  | 100266973       | <i>EML1</i>     | 1                           |                        |                        |            |                   |                | Crx, Pax-4           |                |                    |

Abbreviations: SNP, single-nucleotide polymorphism; Chr, chromosome; DNase, deoxyribonuclease; QTL, quantitative trait loci; eQTL, expression quantitative trait loci; <sup>1</sup>Haploreg: <https://pubs.broadinstitute.org/mammals/haploreg/haploreg.php>.

SNPs in myeloid cell-related genes and CM survival

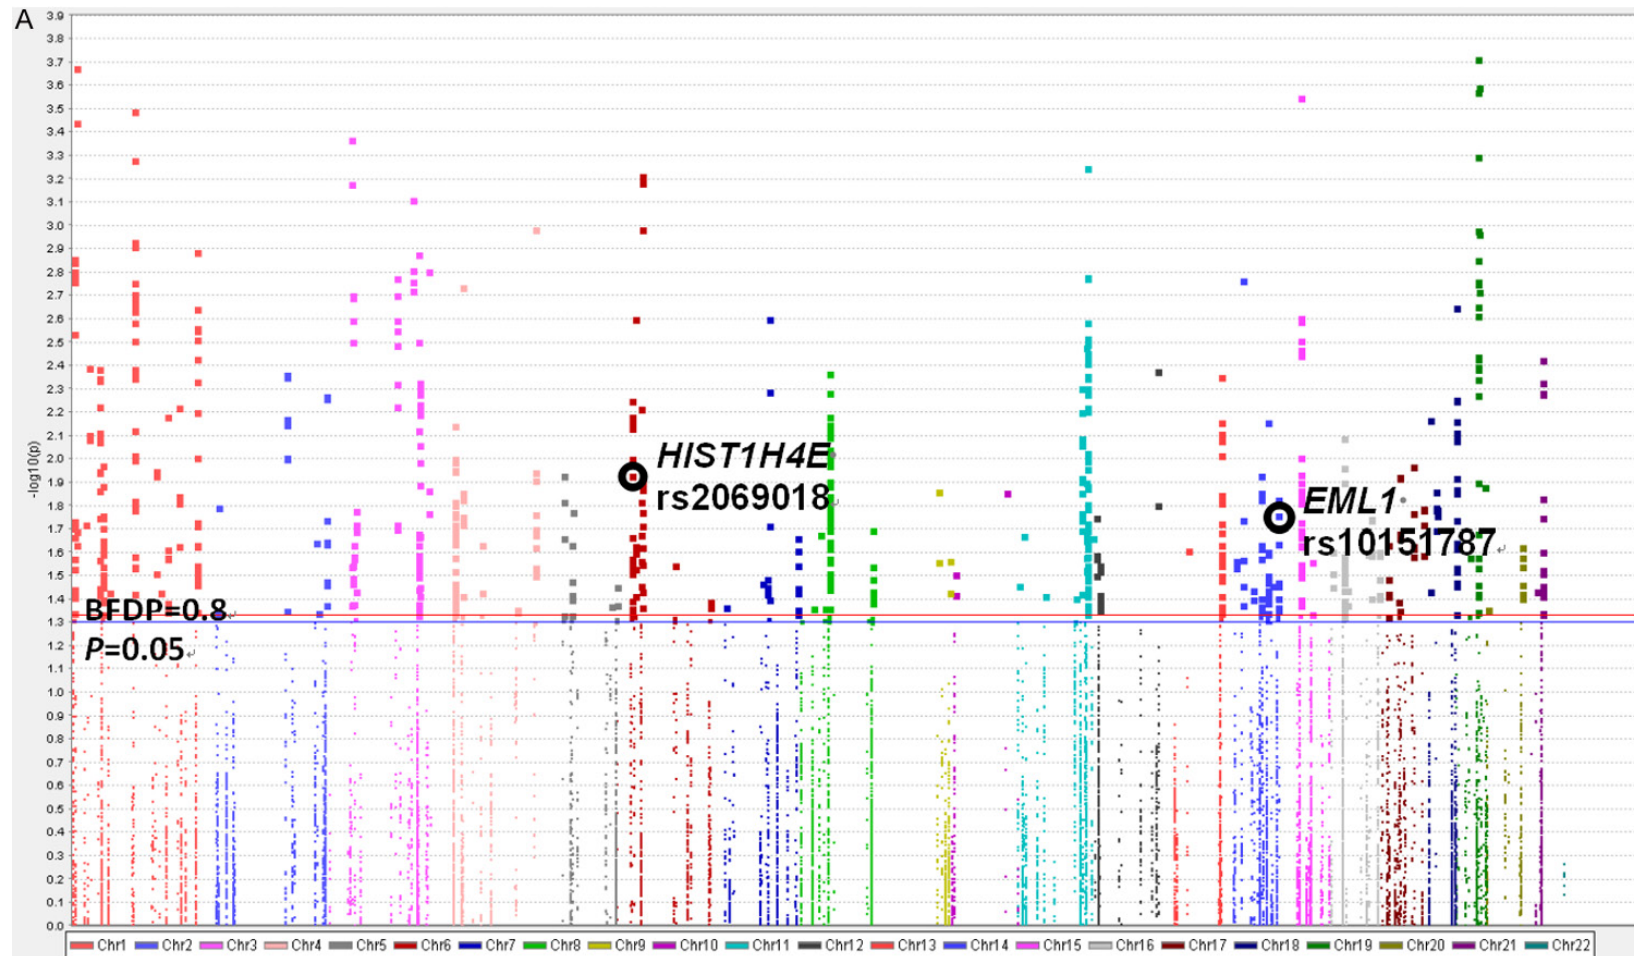

## SNPs in myeloid cell-related genes and CM survival

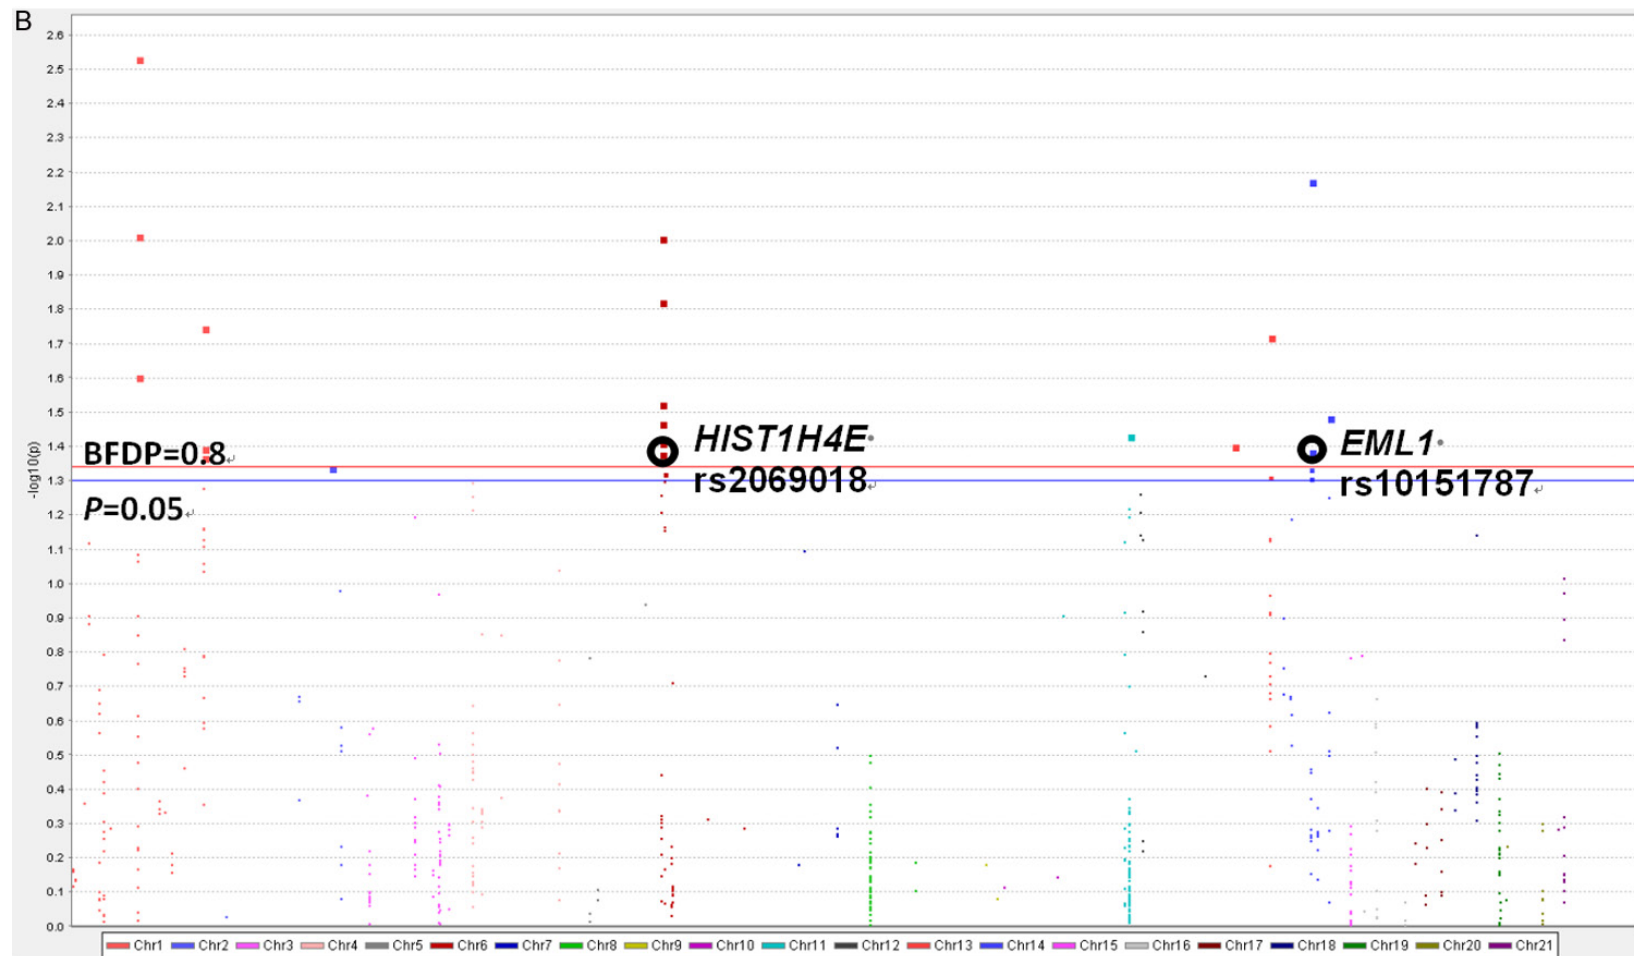

**Supplementary Figure 1.** Manhattan plot. A. Manhattan plot for 24,855 SNPs in the MDACC study. B. Manhattan plot for 1126 SNPs in the NHS/HPFS study. The blue horizontal line indicates  $P$  value equal to 0.05 and the red horizontal line represents BFDP value equal to 0.8. Abbreviations: SNP, single-nucleotide polymorphism; MDACC, The University of Texas MD Anderson Cancer Center; NHS/HPFS, Nurses' Health Study/Health Professionals Follow-up Study; BFDP, Bayesian false-discovery probability.

SNPs in myeloid cell-related genes and CM survival

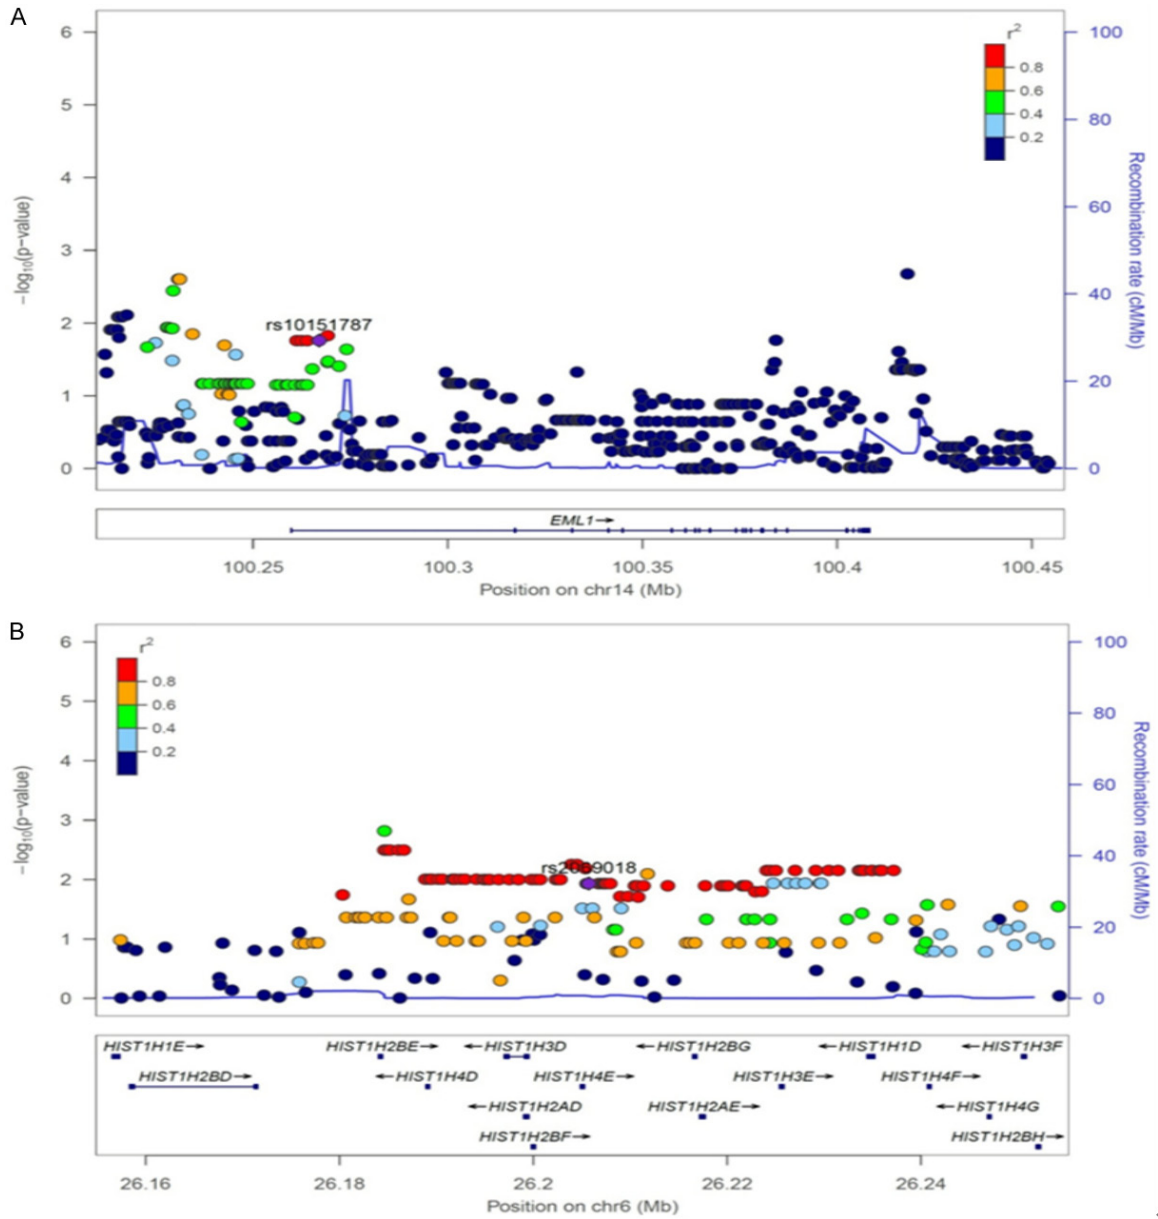

**Supplementary Figure 2.** Regional association plots for *EML1* rs10151787 and *HIST1H4E* rs2069018. Regional association plots contained 50 kb up and downstream of the gene regions in *EML1* (A) and *HIST1H4E* (B).

SNPs in myeloid cell-related genes and CM survival

**Supplementary Table 4.** Stratified Cox analysis for risk alleles of the significant SNPs identified in the MDACC and NHS/HPFS genotyping datasets

| Characteristics                 | 0-1 risk allele <sup>a</sup> |            | 2-4 risk alleles <sup>a</sup> |            | Univariate analysis |        | Multivariate analysis <sup>b</sup> |        | Interaction <sup>c</sup> |
|---------------------------------|------------------------------|------------|-------------------------------|------------|---------------------|--------|------------------------------------|--------|--------------------------|
|                                 | All                          | Death (%)  | All                           | Death (%)  | HR (95% CI)         | P      | HR (95% CI)                        | P      |                          |
| <b>MDACC</b>                    |                              |            |                               |            |                     |        |                                    |        |                          |
| Age (years)                     |                              |            |                               |            |                     |        |                                    |        |                          |
| ≤ 50                            | 321                          | 22 (6.85)  | 50                            | 9 (18.00)  | 2.68 (1.23-5.83)    | 0.013  | 2.62 (1.18-5.86)                   | 0.019  |                          |
| > 50                            | 415                          | 47 (11.33) | 72                            | 17 (23.61) | 2.37 (1.36-4.13)    | 0.002  | 2.63 (1.47-4.72)                   | 0.001  | 0.730                    |
| Sex                             |                              |            |                               |            |                     |        |                                    |        |                          |
| Male                            | 424                          | 51 (12.03) | 72                            | 18 (25.00) | 2.33 (1.36-3.99)    | 0.002  | 2.29 (1.32-4.00)                   | 0.003  |                          |
| Female                          | 312                          | 18 (5.77)  | 50                            | 8 (16.00)  | 2.89 (1.26-6.66)    | 0.013  | 2.95 (1.24-7.00)                   | 0.014  | 0.507                    |
| Stage                           |                              |            |                               |            |                     |        |                                    |        |                          |
| I/II                            | 615                          | 35 (5.69)  | 94                            | 16 (17.02) | 3.22 (1.78-5.83)    | <0.001 | 4.37 (2.36-8.08)                   | <.0001 |                          |
| III/IV                          | 121                          | 34 (28.10) | 28                            | 10 (35.71) | 1.41 (0.70-2.85)    | 0.343  | 1.27 (0.59-2.74)                   | 0.537  | 0.297                    |
| Breslow thickness (mm)          |                              |            |                               |            |                     |        |                                    |        |                          |
| ≤1                              | 306                          | 5 (1.63)   | 41                            | 2 (4.88)   | 3.07 (0.60-15.83)   | 0.180  | 2.76 (0.06-9.05)                   | 0.829  |                          |
| >1                              | 430                          | 64 (14.88) | 81                            | 24 (29.63) | 2.26 (1.42-3.62)    | 0.0006 | 2.54 (1.58-4.09)                   | 0.0001 | 0.956                    |
| Ulceration                      |                              |            |                               |            |                     |        |                                    |        |                          |
| No                              | 585                          | 36 (6.15)  | 96                            | 12 (12.50) | 2.10 (1.09-4.05)    | 0.026  | 1.91 (0.98-3.74)                   | 0.058  |                          |
| Yes                             | 131                          | 30 (22.90) | 24                            | 13 (54.17) | 3.34 (1.74-6.42)    | <0.001 | 3.23 (1.67-6.25)                   | 0.0005 | 0.573                    |
| Missing                         | 22                           |            |                               |            |                     |        |                                    |        |                          |
| Mitotic rate (mm <sup>2</sup> ) |                              |            |                               |            |                     |        |                                    |        |                          |
| ≤1                              | 230                          | 6 (2.61)   | 45                            | 3 (6.67)   | 2.65 (0.66-10.61)   | 0.168  | 3.34 (0.56-19.43)                  | 0.179  |                          |
| >1                              | 506                          | 63 (12.45) | 77                            | 23 (29.87) | 2.72 (1.69-4.39)    | <.0001 | 2.50 (1.53-4.10)                   | 0.0003 | 0.467                    |
| <b>NHS/HPFS</b>                 |                              |            |                               |            |                     |        |                                    |        |                          |
| Age (years)                     |                              |            |                               |            |                     |        |                                    |        |                          |
| ≤ 50                            | 61                           | 2 (3.28)   | 11                            | 1 (9.09)   | 2.78 (0.25-30.69)   | 0.403  | 2.87 (0.26-31.70)                  | 0.391  |                          |
| > 50                            | 299                          | 37 (12.37) | 38                            | 8 (21.05)  | 1.74 (0.81-3.73)    | 0.156  | 1.74 (0.81-3.73)                   | 0.157  | 0.757                    |
| Sex                             |                              |            |                               |            |                     |        |                                    |        |                          |
| Male                            | 124                          | 14 (11.29) | 14                            | 3 (21.43)  | 1.71 (0.49-5.96)    | 0.401  | 2.05 (0.57-7.41)                   | 0.276  |                          |
| Female                          | 236                          | 25 (10.59) | 35                            | 6 (17.14)  | 1.70 (0.70-4.13)    | 0.246  | 1.85 (0.76-4.52)                   | 0.178  | 0.816                    |

Abbreviations: SNP, single-nucleotide polymorphism; MDACC, The University of Texas MD Anderson Cancer Center; NHS, the Nurses' Health Study; HPFS, the Health Professionals Follow-up Study; HR, hazards ratio; CI, confidence interval. <sup>a</sup>Risk alleles include *EML1* rs10151787 G allele and *HIST1H4E* rs2069018 C allele; <sup>b</sup>Adjusted for age, sex, Breslow thickness, stage, ulceration and mitotic rate in Cox models of SNPs and CMSS in the MDACC dataset and adjusted for age and sex only in the NHS/HPFS datasets; <sup>c</sup>Interaction: the interaction between the risk alleles and each clinical variable.



SNPs in myeloid cell-related genes and CM survival

A

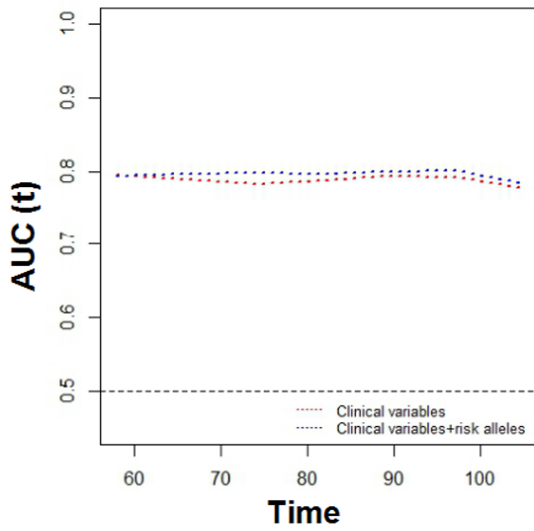

B

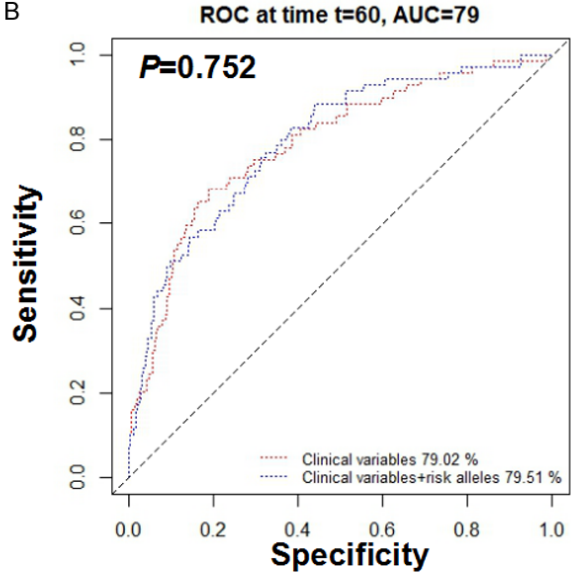

C

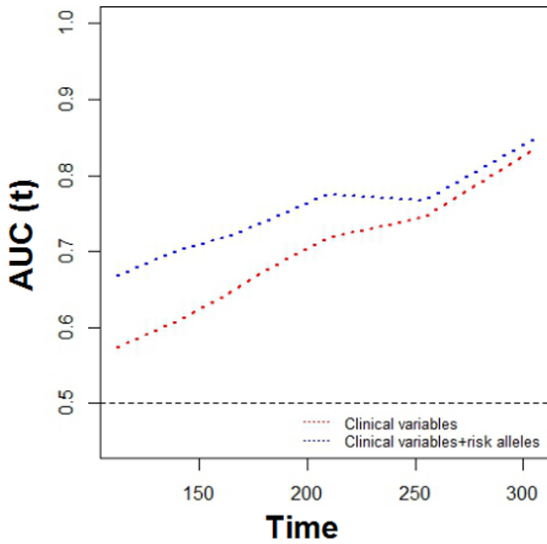

D

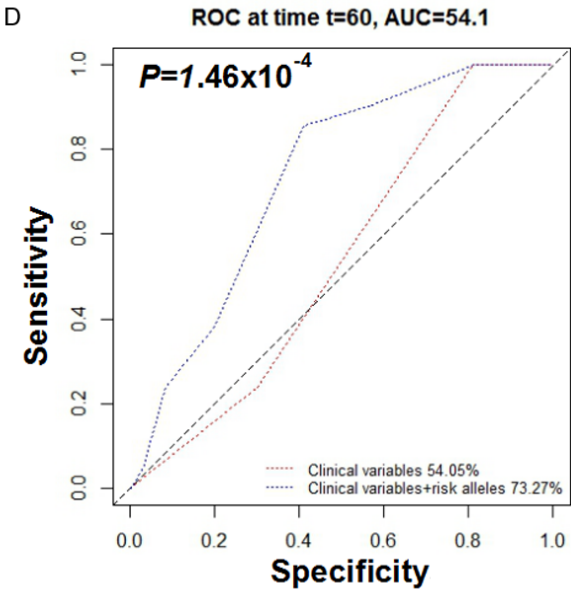

E

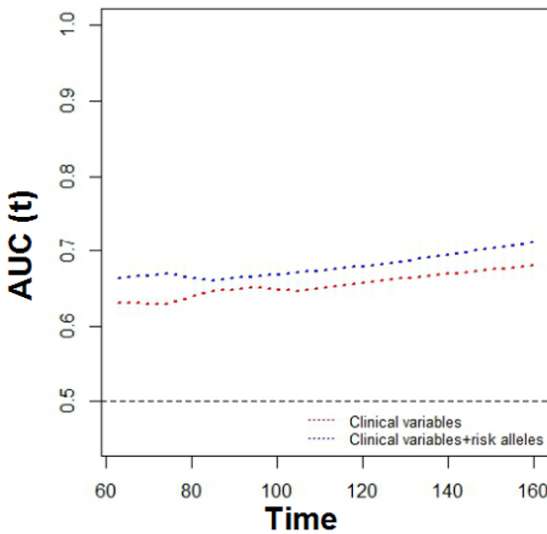

F

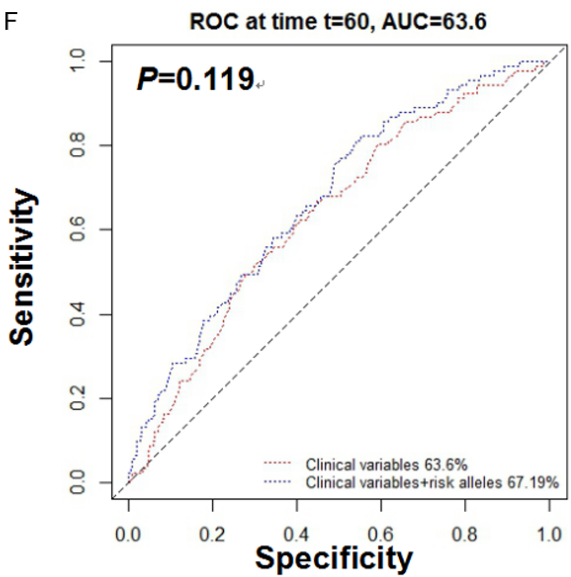

## SNPs in myeloid cell-related genes and CM survival

**Supplementary Figure 3.** ROC curve and time-dependent AUC estimation for five-year CMSS prediction in CM patients. The Time-dependent AUC estimation based on clinical variables plus risk alleles in the MDACC dataset (A), the NHS/HPFS dataset (C) and the combined MDACC and NHS/HPFS dataset (E). The five-year CMSS prediction by ROC curve in the MDACC dataset (B), the NHS/HPFS dataset (D) and the combined MDACC and NHS/HPFS dataset (F). Abbreviations: CMSS, cutaneous melanoma-specific survival; SNP, single-nucleotide polymorphism; AUC, area under receiver curve; MDACC, The University of Texas MD Anderson Cancer Center; NHS/HPFS, Nurses' Health Study/Health Professionals Follow-up Study; ROC, receiver operating characteristic.

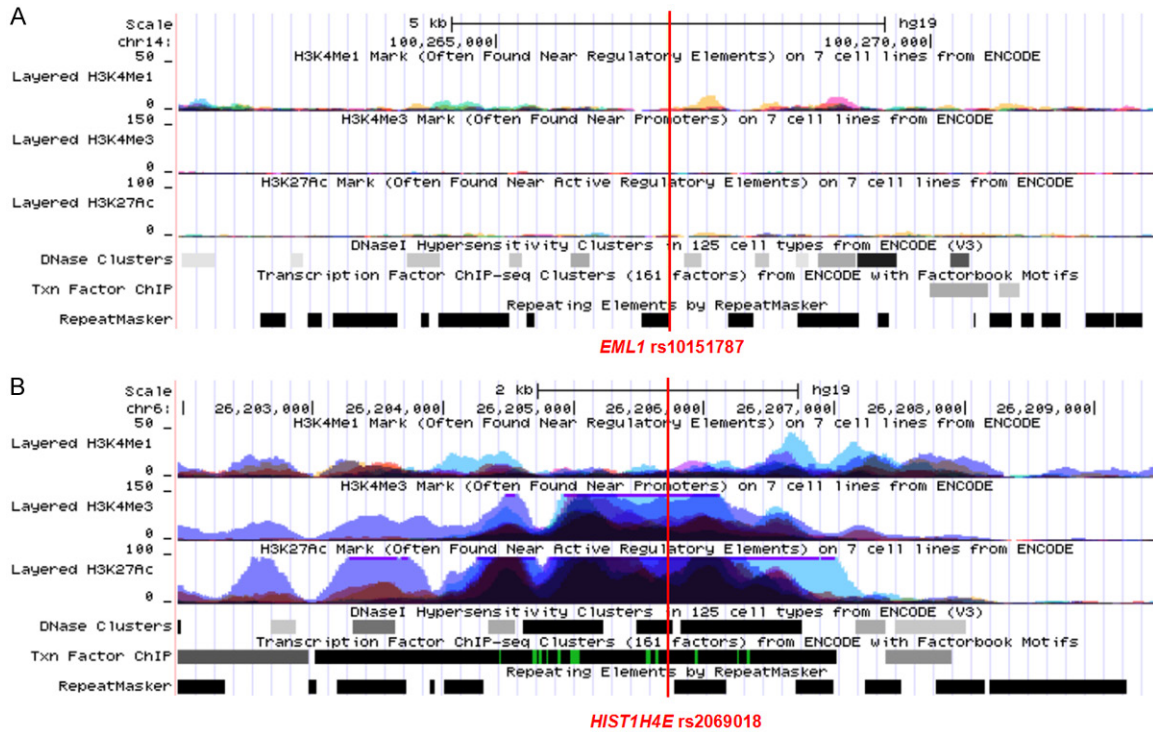

**Supplementary Figure 4.** Functional prediction of EML rs10151787 and HIST1H4E rs2069018 in the ENCODE data. Location and functional prediction of *EML* rs10151787 (A). Location and functional prediction of *HIST1H4E* rs2069018 (B). The H3K27Ac, H3K4Me1, and H3K4Me3 tracks showed the genome-wide levels of enrichment of acetylation of lysine 27, the mono-methylation of lysine 4, and tri-methylation of lysine 4 of the H3 histone protein. DNase clusters track showed DNase hypersensitivity areas. Txn factor track showed regions of transcription factor binding of DNA.

SNPs in myeloid cell-related genes and CM survival

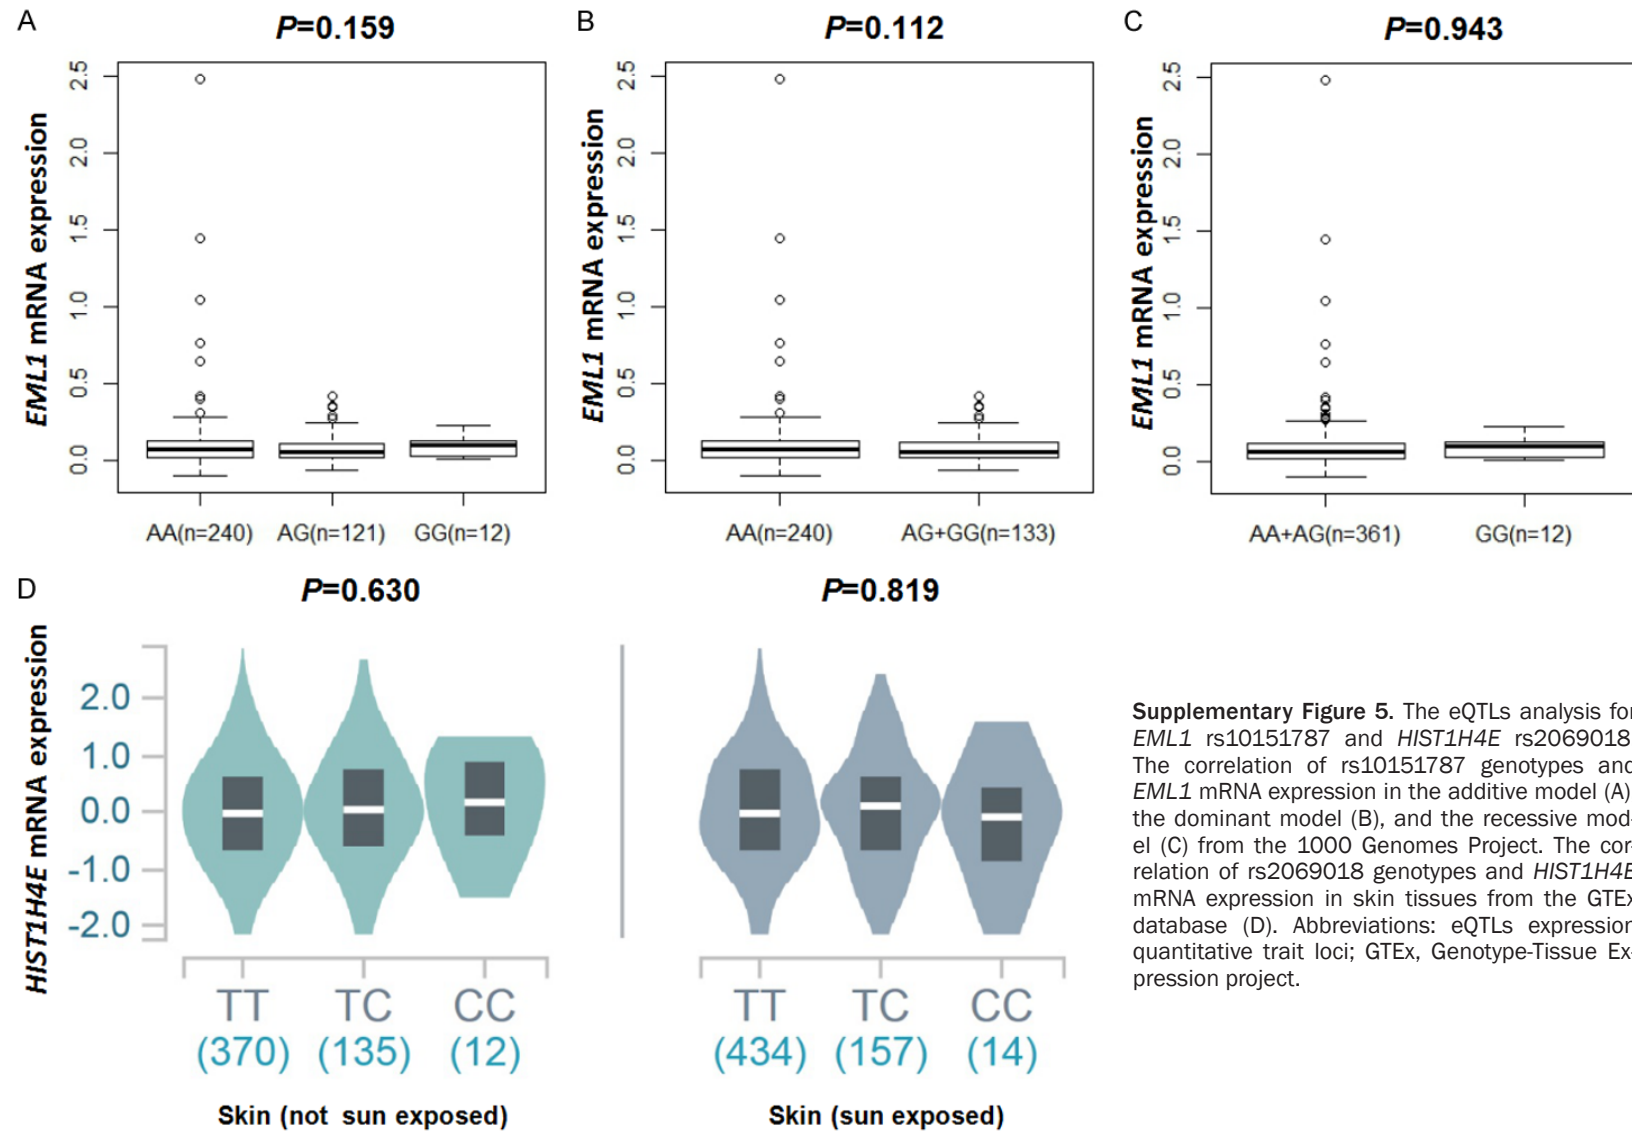

**Supplementary Figure 5.** The eQTLs analysis for *EML1* rs10151787 and *HIST1H4E* rs2069018. The correlation of rs10151787 genotypes and *EML1* mRNA expression in the additive model (A), the dominant model (B), and the recessive model (C) from the 1000 Genomes Project. The correlation of rs2069018 genotypes and *HIST1H4E* mRNA expression in skin tissues from the GTEx database (D). Abbreviations: eQTLs expression quantitative trait loci; GTEx, Genotype-Tissue Expression project.

## SNPs in myeloid cell-related genes and CM survival

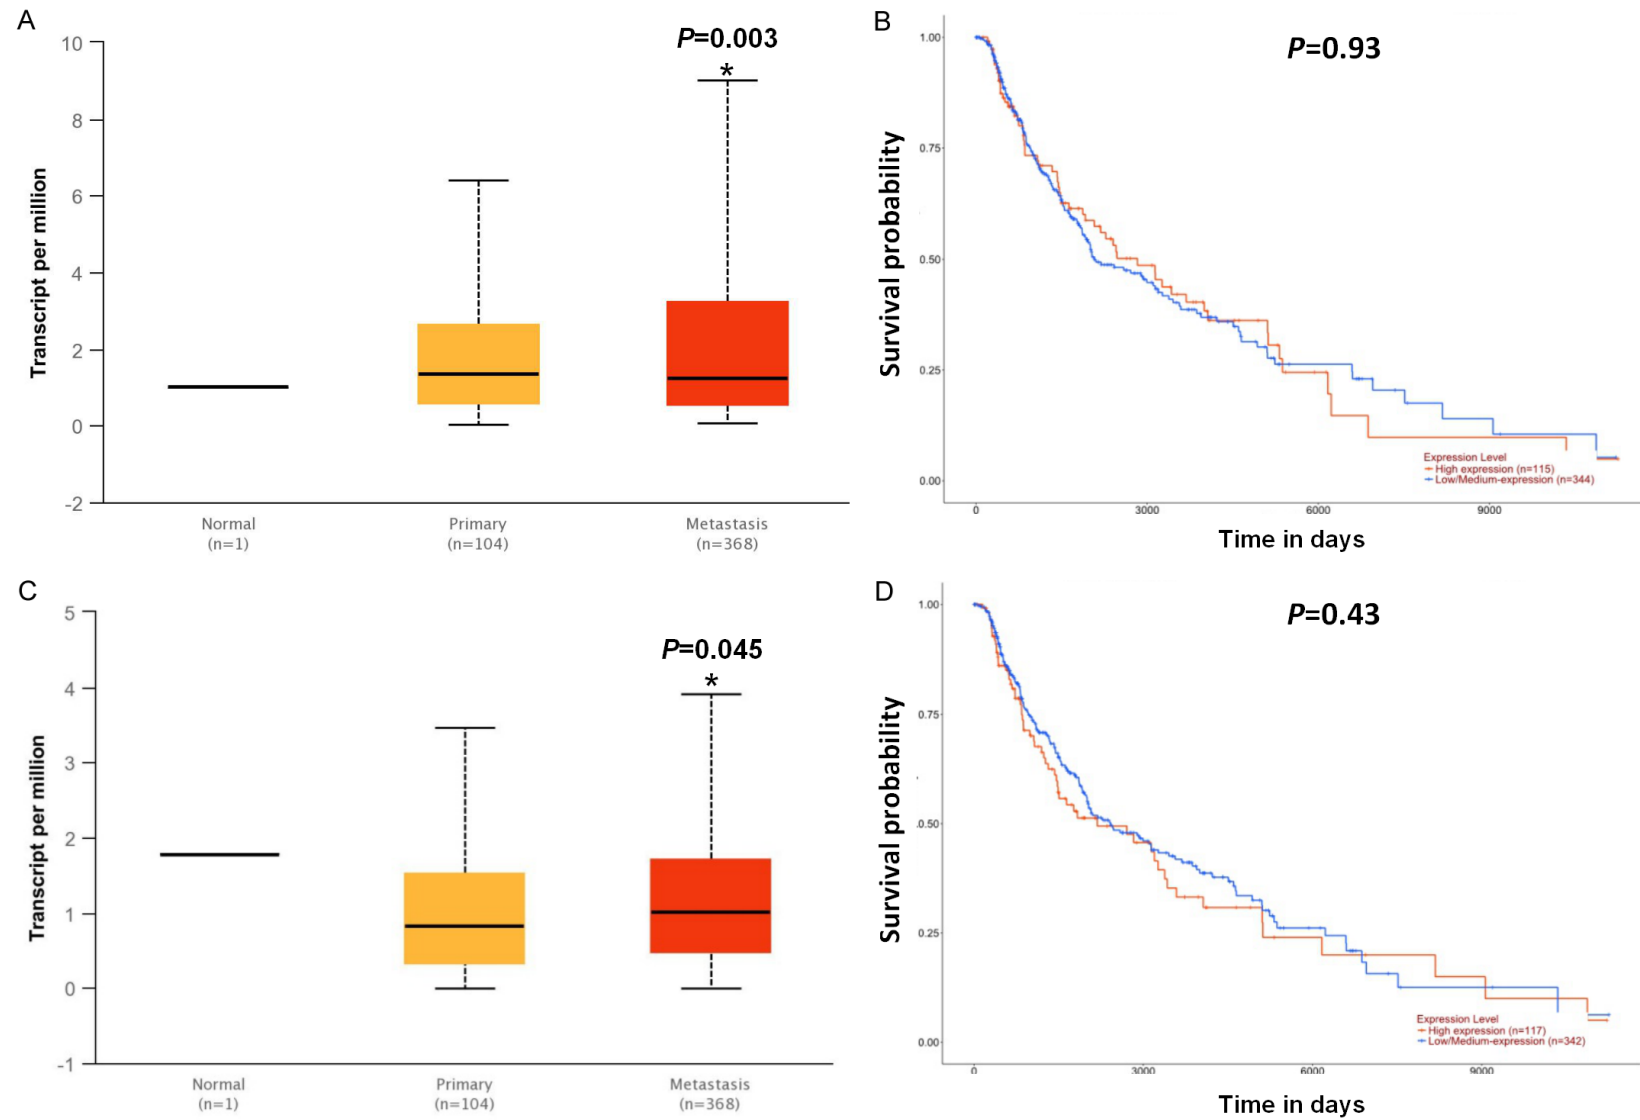

**Supplementary Figure 6.** Differential mRNA expression analysis and survival prediction in the TCGA database. The difference of *EML1* (A) and *HIST1H4E* (C) mRNA expression between primary melanoma tissues and metastatic melanoma tissues in the TCGA database; *EML1* mRNA expression showed no significant correlation with melanoma survival probability in the TCGA database (B). *HIST1H4E* mRNA expression showed no significant correlation with melanoma survival probability in the TCGA database (D). Abbreviation: TCGA, The Cancer Genome Atlas.
